# Supplementary material for: Fabrication of paper devices via laser-heating-wax-printing for high-tech enzyme-linked immunosorbent assays with low-tech pen-type pH meter readout
Source: Royal Society of Chemistry journal article supplement (doi:10.1039/c6an02422j), 2017-01-01
Supplement: c6an02422j1.pdf [file c6an02422j1.pdf]

## Electronic Supplementary Information

# Fabrication of paper devices via laser-heating-wax-printing for high-tech enzyme-linked immunosorbent assays with low-tech pen-type pH meter readout

Shangwang Le,<sup>a</sup> Hui Zhou,<sup>b</sup> Jinfang Nie,<sup>\*a</sup> Chaohong Cao,<sup>a</sup> Jiani Yang,<sup>\*a</sup>

Hongcheng Pan,<sup>a</sup> Jianping Li<sup>a</sup> and Yun Zhang<sup>\*a</sup>

<sup>a</sup> *Guangxi Key Laboratory of Electrochemical and Magnetochemical Function  
Materials, College of Chemistry and Bioengineering, Guilin University of Technology,  
Guilin 541004, P. R. China*

<sup>b</sup> *College of Chemistry and Chemical Engineering, Gannan Normal University,  
Ganzhou 341000, P. R. China*

\*Corresponding Author:

Niejinfang@glut.edu.cn, jianiy\_15@163.com, zy@glut.edu.cn

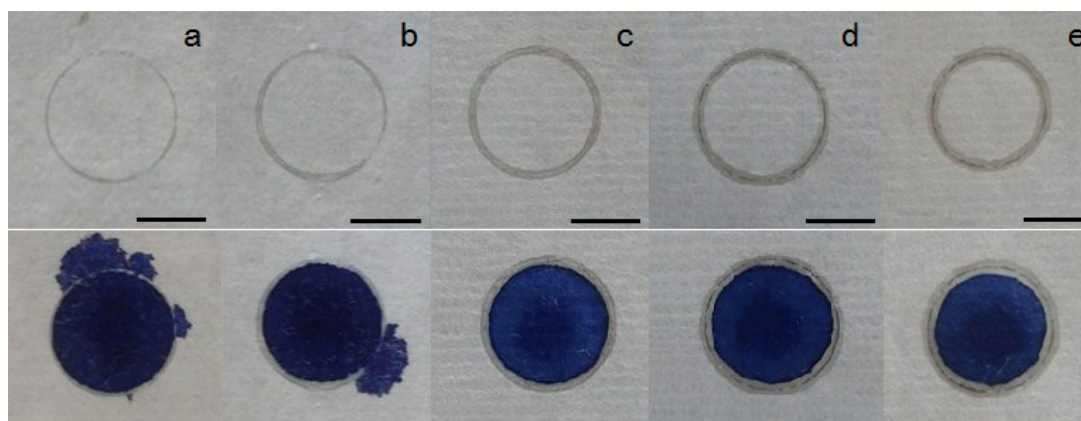

**Fig. S1** Images of wax-patterned paper devices fabricated by the LHWP method at different applied currents before (up) and after (down) the wax-free central regions were wetted with blue ink aqueous solutions: (a) 1, (b) 1.4, (c) 1.9, (d) 2.2, and (e) 2.4 mA. Each of the scale bars is 2.5 mm.

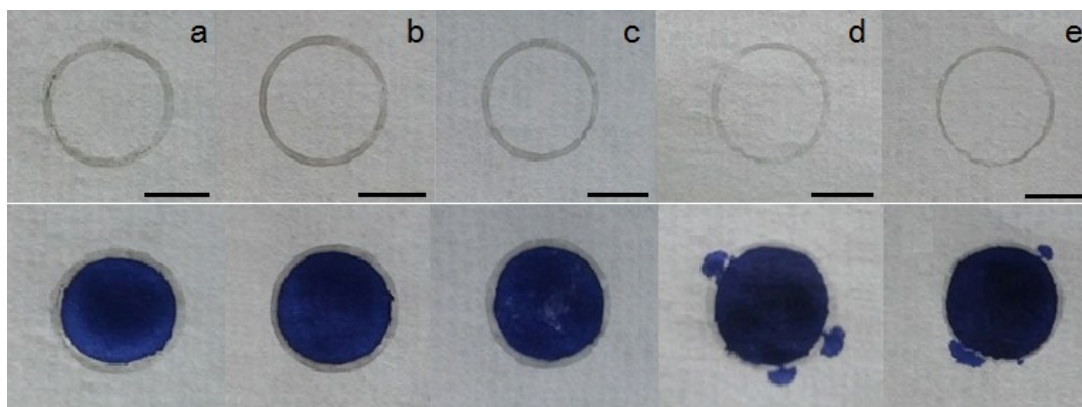

**Fig. S2** Images of wax-patterned paper devices fabricated by the LHPW method at different moving rates of laser beam before (up) and after (down) the wax-free central regions were wetted with blue ink aqueous solutions: (a) 18, (b) 25, (c) 32, (d) 39, and (e) 46 mm/s. Each of the scale bars is 2.5 mm.
